# Supplementary material
Source: HighWire-hosted journal article supplement (https://cmaj.ca/highwire/filestream/59090/field_highwire_adjunct_files/0/apnea-su-1-at.pdf)

**Appendix 1 (as supplied by the authors): A flow diagram illustrating the follow-up process of sleep apnea patients and matched controls**

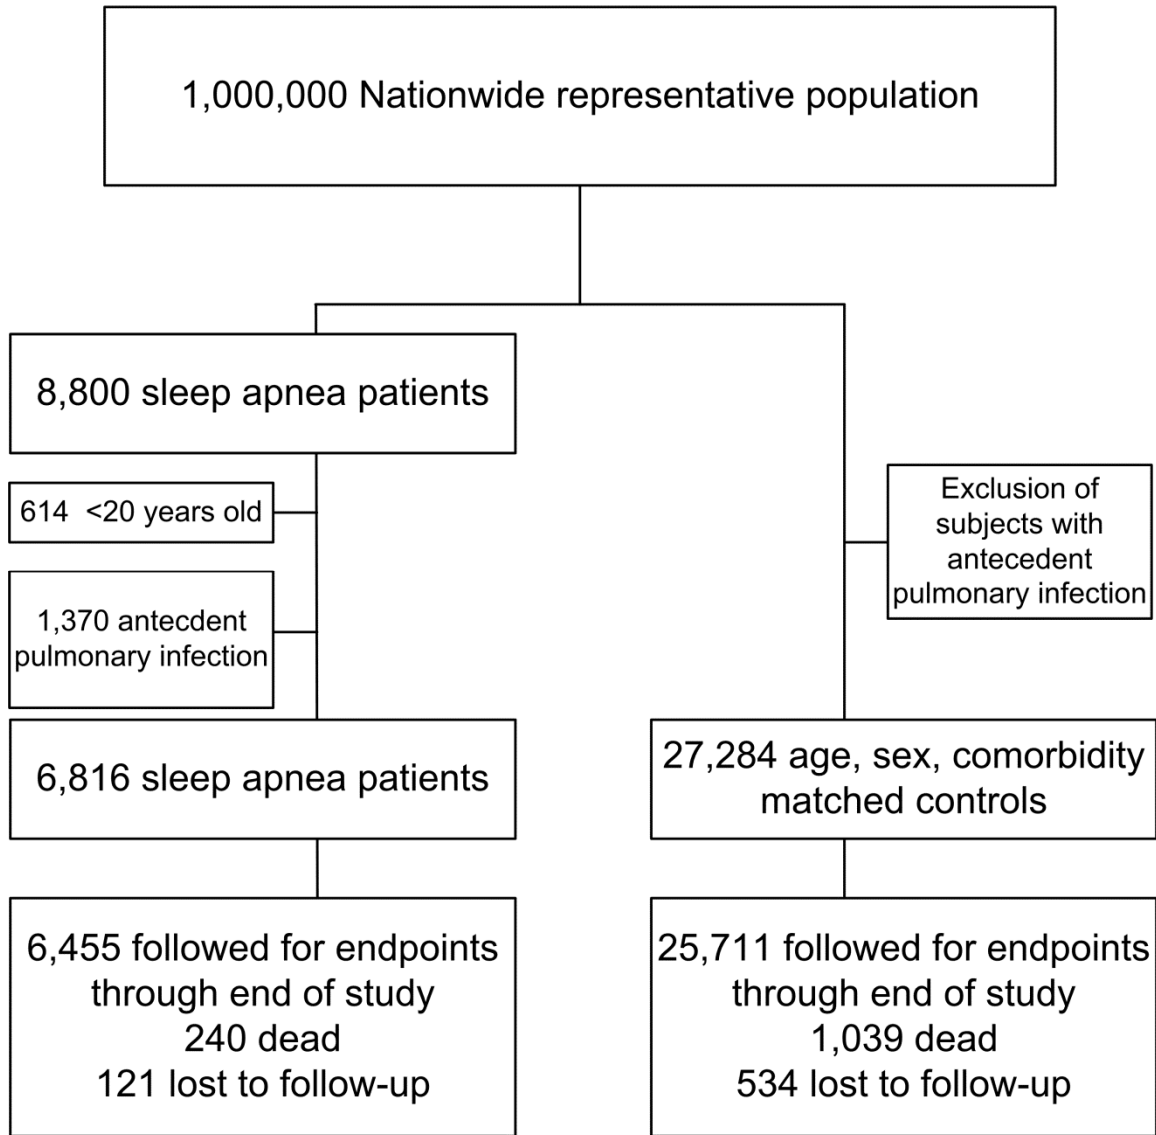

Supplement: apnea-su-1-at.pdf [file apnea-su-1-at.pdf]
